# Supplementary material
Source: MDPI journal article supplement (https://www.mdpi.com/2297-8739/10/12/581)
Supplement: s1 [file s1]

# Supplementary Materials

## Rational fabrication of benzene-linked porous polymers for selective CO<sub>2</sub> capture

**Xiaofei Yan <sup>1,†</sup>, Fuqun Zhai <sup>1,†</sup>, Zifei Sun <sup>1</sup>, Jingwen Chen <sup>2</sup>, Dingming Xue <sup>1,\*</sup> and Jie Miao <sup>3,\*</sup>**

<sup>1</sup> Nanjing Institute of Environmental Sciences, Ministry of Ecology and Environment, 8 Jiangwangmiao Street, Nanjing 210042, China

<sup>2</sup> Key Laboratory for Protected Agricultural Engineering in the Middle and Lower Reaches of Yangtze River, Institute of Agricultural Facilities and Equipment, Jiangsu Academy of Agricultural Sciences, Ministry of Agriculture and Rural Affairs, Nanjing 210014, China

<sup>3</sup> School of Environmental Science and Engineering, Nanjing Tech University, Nanjing 211816, China

\* Correspondence: xue\_dingming@nies.org (D.X.); miaojie@njtech.edu.cn (J.M.)

<sup>†</sup> These authors contributed equally to this work.

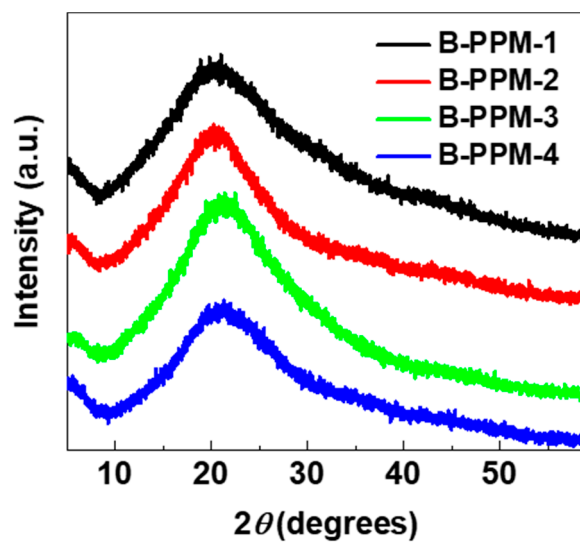

**Figurer S1.** XRD pattern of the B-PPMs.

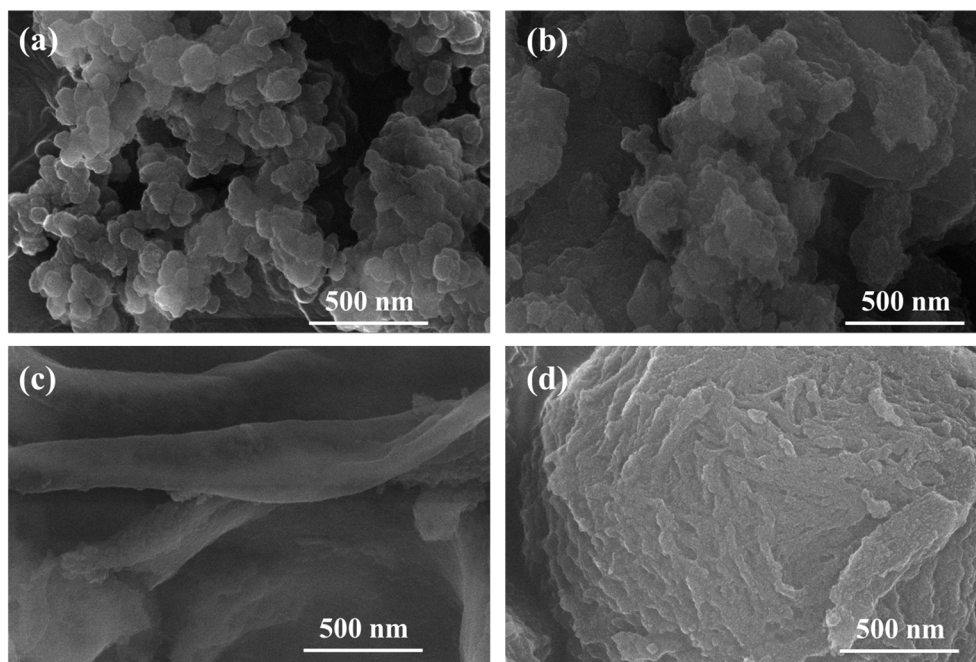

**Figure S2.** SEM images of the (a) B-PPM-1, (b) B-PPM-2, (c) B-PPM-3 and (d) B-PPM-4.

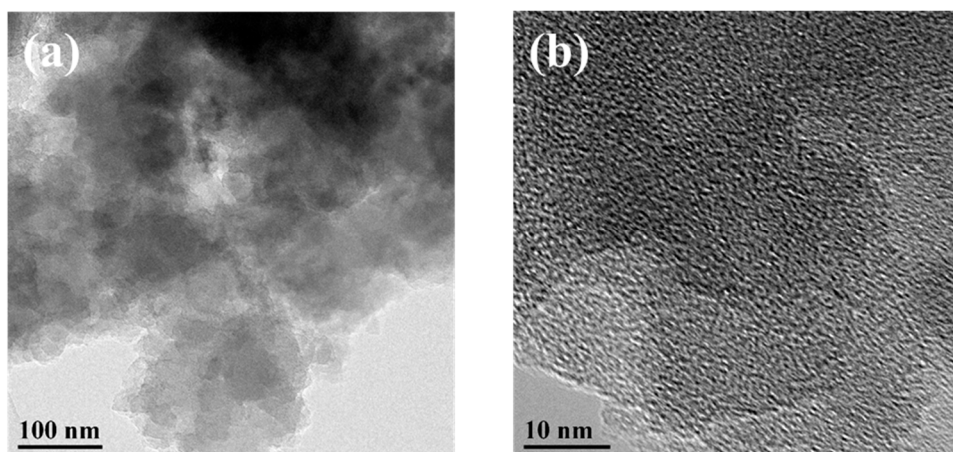

**Figure S3.** TEM images (a) 100 nm and (b) 10 nm of the B-PPM-2.

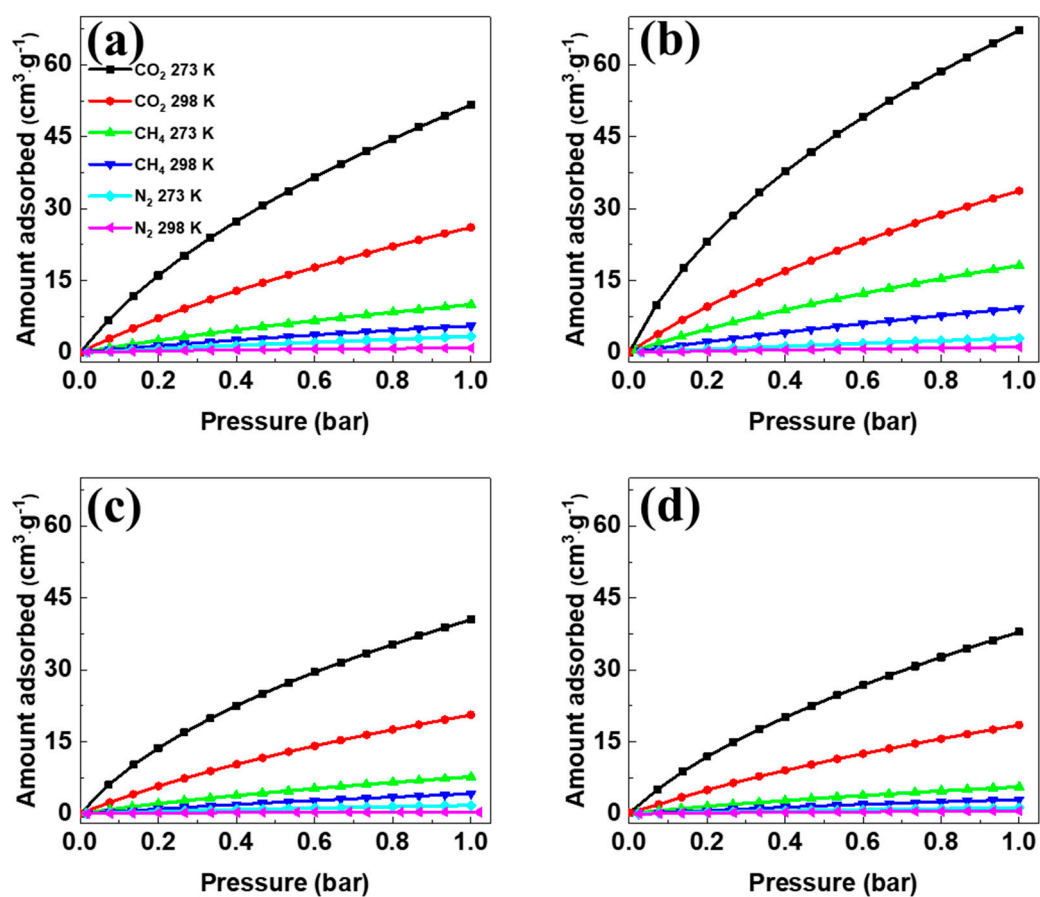

**Figure S4.** CO<sub>2</sub>, N<sub>2</sub> and CH<sub>4</sub> adsorption isotherms of the sample (a) B-PPM-1, (b) B-PPM-2, (c) B-PPM-3, and (d) B-PPM-4 at 273 K and 298 K and 1 bar.

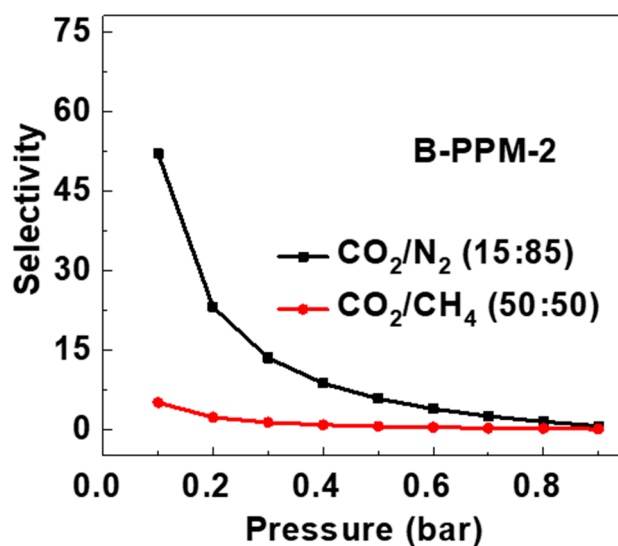

**Figure S5.** IAST selectivity of CO<sub>2</sub>/N<sub>2</sub> (15:85) and CO<sub>2</sub>/CH<sub>4</sub> (50:50) on the B-PPM-2 at 298 K.

**Table S1.** Comparison of the cost of adsorbents based on the price of monomers and catalysts

| Sample  | Monomer 1<br>(Price)                                                                                                                                       | Monomer 2<br>(Price)                                                                                                                                                                        | Catalyst<br>(Price)                   | Price<br>/100g | Ref.      |
|---------|------------------------------------------------------------------------------------------------------------------------------------------------------------|---------------------------------------------------------------------------------------------------------------------------------------------------------------------------------------------|---------------------------------------|----------------|-----------|
| B-PPM-2 | 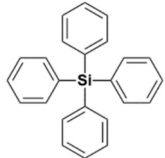<br>tetraphenylsilane<br>(\$743/100mL)                                  | <br>$\alpha, \alpha'$ -Dibromo-p-xylene<br>(\$82/100g)                                                   | —                                     | \$792          | This work |
| TPI-5   | <br>4,4',4'-(1,3,5-Triazine-2,4,6-Triyl)<br>Trianiline<br>(\$1006/100g) | <br>4,4'-Oxybis(1,2-dimethylb<br>enzene)<br><i>synthesized from</i><br><i>precursor</i><br>(\$832/100g) | Pd(dba) <sub>2</sub><br>(\$230/2g)    | \$964          | [1]       |
| PAF-1   | <br>2,2'-Bipyridine<br>(\$464/100g)                                     | <br>Tetrakis(4-bromophenyl)<br>methane<br>(\$3528/100g)                                                 | [Ni(cod) <sub>2</sub> ]<br>(\$159/2g) | \$4136         | [2]       |

|          |                                                                                                                                                      |                                                                                                                                              |   |                |     |
|----------|------------------------------------------------------------------------------------------------------------------------------------------------------|----------------------------------------------------------------------------------------------------------------------------------------------|---|----------------|-----|
| PSN-TAPB | 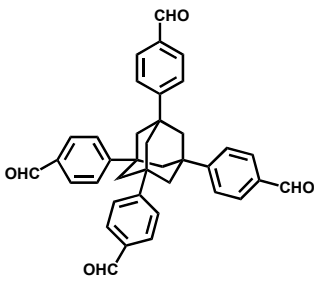 <p>1,3,5,7-Tetrakis(4-formylphenyl)adamantane<br/>(\$1094 /1g)</p> |  <p>1,3,5-Tris(4-aminophenyl)benzene<br/>(\$2093/100g)</p> | — | ~\$2800/<br>1g | [3] |
| CPCs     |  <p>1,2,4,5-benzenetetramine tetrahydrochloride<br/>(\$210/1g)</p>  |  <p>1,3,5-(4-formylphenyl)-benzene<br/>(\$1714/100g)</p>   | — | \$2259         | [4] |

The price of chemicals is obtained from Sigma-Aldrich. The price is mostly based on 100 g (or 100 mL) of chemicals, and other units will be used if chemicals with 100 g (or 100 mL) is not available.

1. Liebl, M.R.; Senker, J. Microporous functionalized triazine-based polyimides with high CO<sub>2</sub> capture capacity. *Chem. Mater.* **2013**, *25*, 970-980, doi:10.1021/cm4000894.
2. Ben, T.; Ren, H.; Ma, S.; Cao, D.; Lan, J.; Jing, X.; Wang, W.; Xu, J.; Deng, F.; Simmons, J.M.; et al. Targeted synthesis of a porous aromatic framework with high stability and exceptionally high surface area. *Angew. Chem. Int. Ed.* **2009**, *48*, 9457-9460, doi:10.1002/anie.200904637.
3. Li, G.; Zhang, B.; Yan, J.; Wang, Z. Micro- and mesoporous poly(Schiff-base)s constructed from different building blocks and their adsorption behaviors towards organic vapors and CO<sub>2</sub> gas. *J. Mater. Chem. A* **2014**, *2*, 18881-18888, doi:10.1039/c4ta04429k.
4. Ashourirad, B.; Sekizkardes, A.K.; Altarawneh, S.; El-Kaderi, H.M. Exceptional gas adsorption properties by nitrogen-doped porous carbons derived from benzimidazole-linked polymers. *Chem. Mater.* **2015**, *27*, 1349-1358, doi:10.1021/cm504435m.
